# Supplementary material for: Self-healable and freeze-resistant polyelectrolyte based on an EG anchor chain and dual dynamic reversible interaction as highly sensitive ionic skin
Source: Royal Society of Chemistry journal article supplement (doi:10.1039/d2tc05393d), 2023-01-01
Supplement: d2tc05393d1.pdf [file d2tc05393d1.pdf]

**Self-healable and freeze-resistance polyelectrolyte based on EG anchor chain and dual dynamic reversible interaction as highly sensitive ionic skins**

Haiyang Liao<sup>a,b</sup>; Wenzhao Zhong<sup>a</sup>; Jieling Han<sup>a</sup>; Yeqi Xiao<sup>a</sup>; Tieming Xiao<sup>a</sup>; Xiao Sun<sup>a</sup>,

\*; Guixin Cui<sup>b</sup>; Jie Huang<sup>a,\*</sup>

<sup>a</sup> *School of Mechanical Engineering, Hunan University of Technology, Zhuzhou Hunan 412007, China*

<sup>b</sup> *China Textile Academy (Zhejiang) Technology Research Institute Co., Ltd., Shaoxing Zhejiang 312071, China*

\* *Corresponding Author: Xiao Sun, Email address: sxbug@163.com, Jie Huang, Email address: huangjie3@alumni.sjtu.edu.cn*

**Supporting information:**

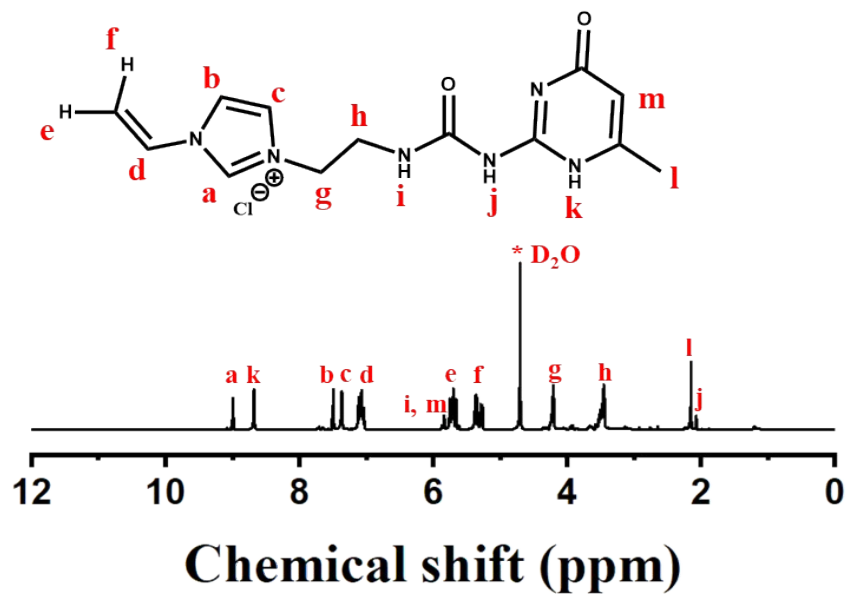

Fig. S1.  $^1\text{H}$ -NMR spectra of UPy-VIm

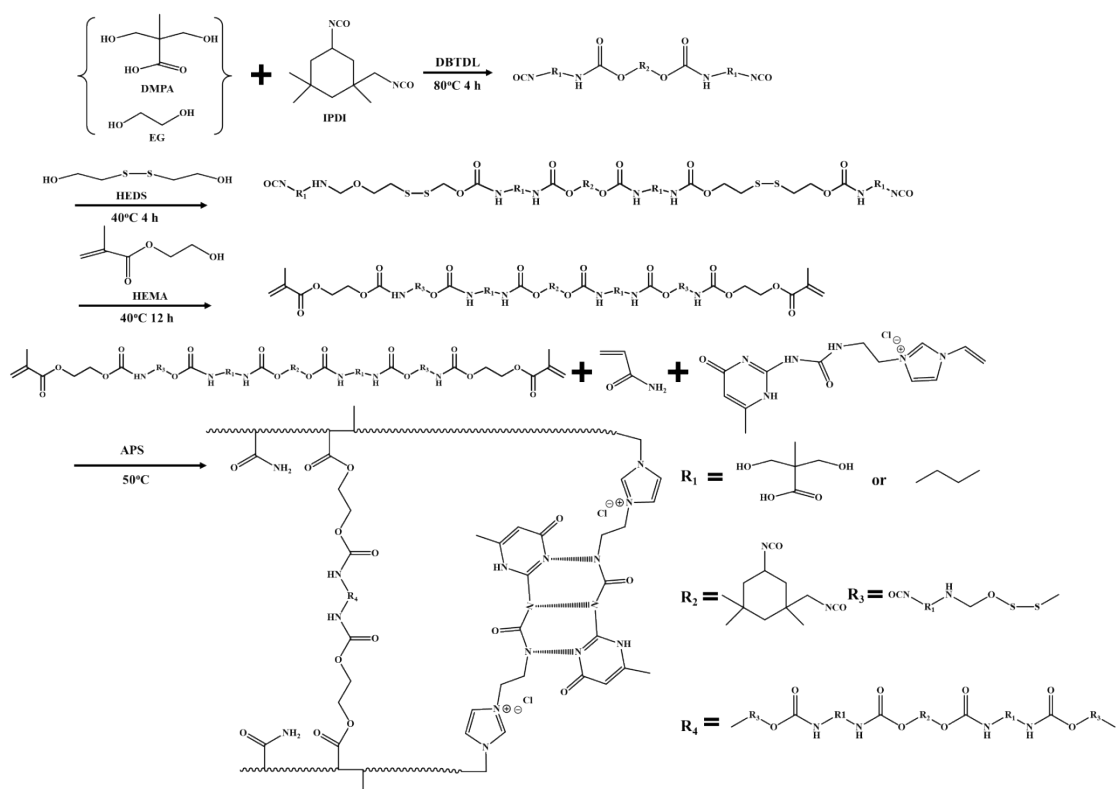

Fig. S2. Synthesis routine of EG based dual functional waterborne anionic polyurethane acrylates (DB-waPU) and DF-hydrogel

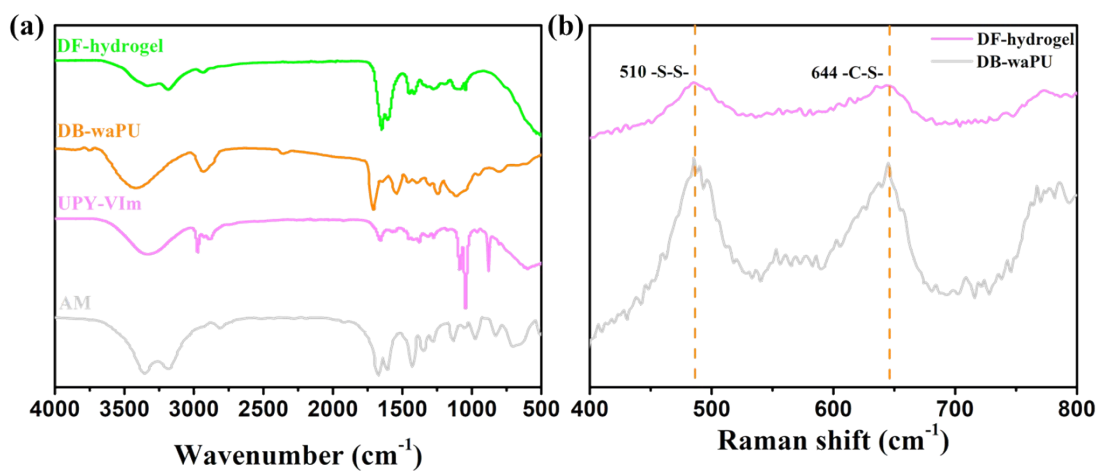

Fig. S3. (a) FTIR spectra of AM monomer, DB-waPU and DF-hydrogel, (b) Raman spectra of DB-waPU and DF-hydrogel

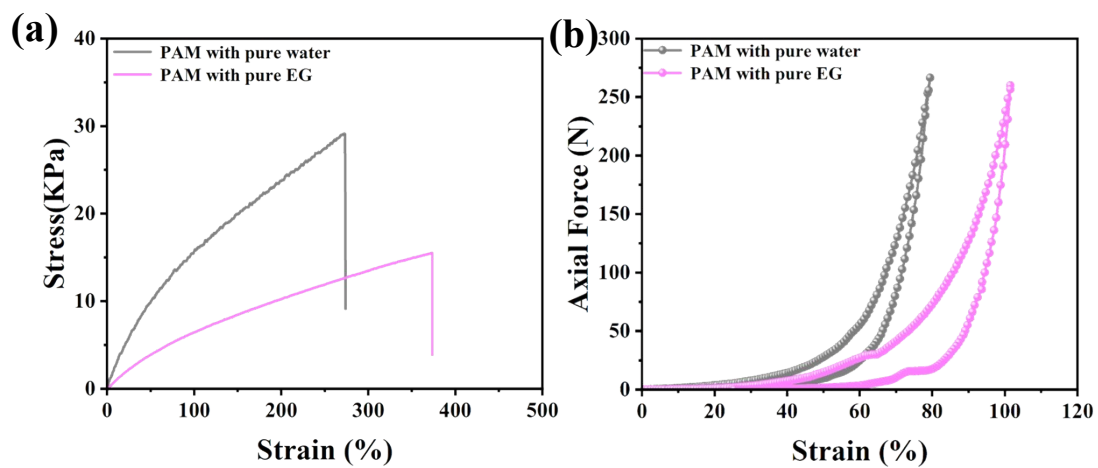

Fig. S4. Mechanical comparison of PAM with pure water and PAM with pure EG: (a) stretchability, (b) compressibility

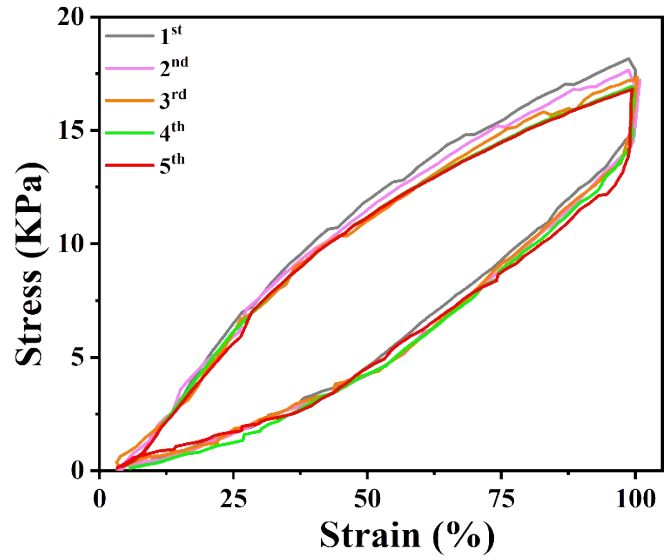

Fig. S5. Cycles of loading-unloading tests for DF-hydrogel

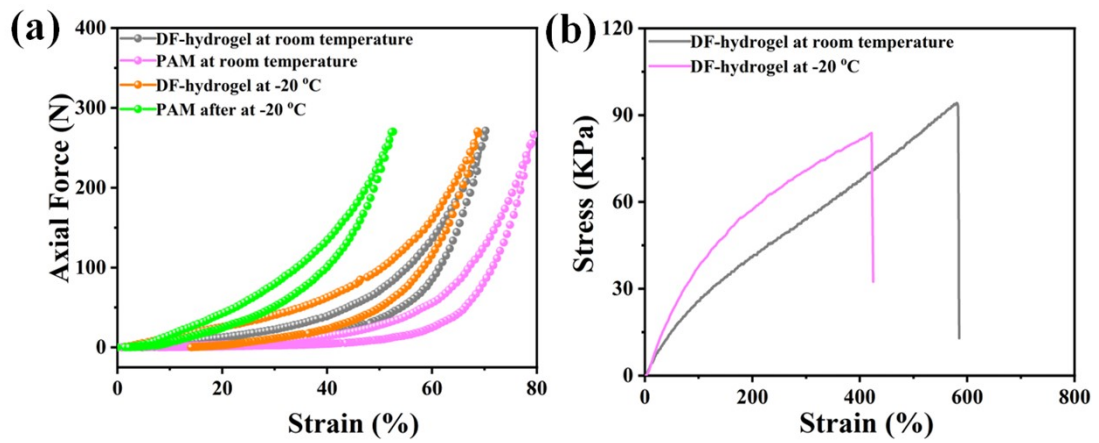

Fig. S6. (a) Compression tests with different hydrogel samples, (b) Anti-freezing

performances for DF-hydrogel

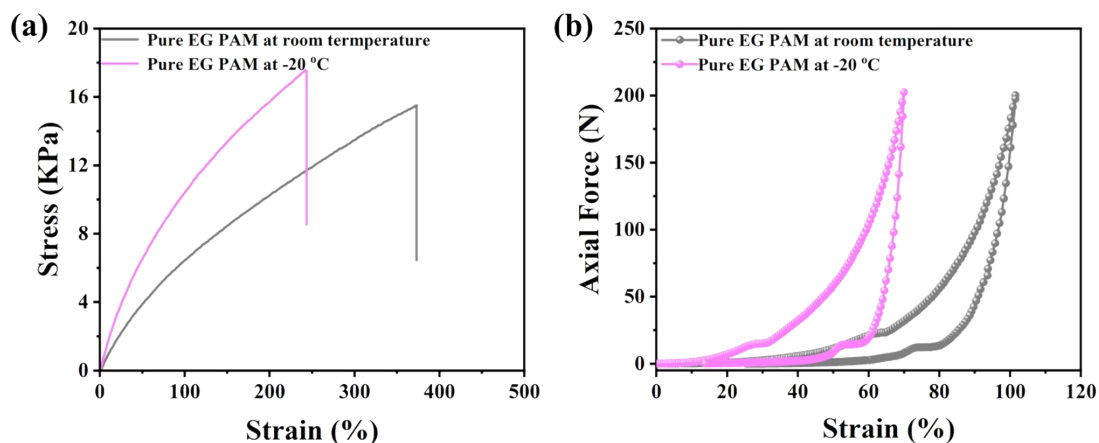

Fig. S7. Anti-freezing of mechanical properties for PAM organogel: (a) stretchability and (b) compressibility

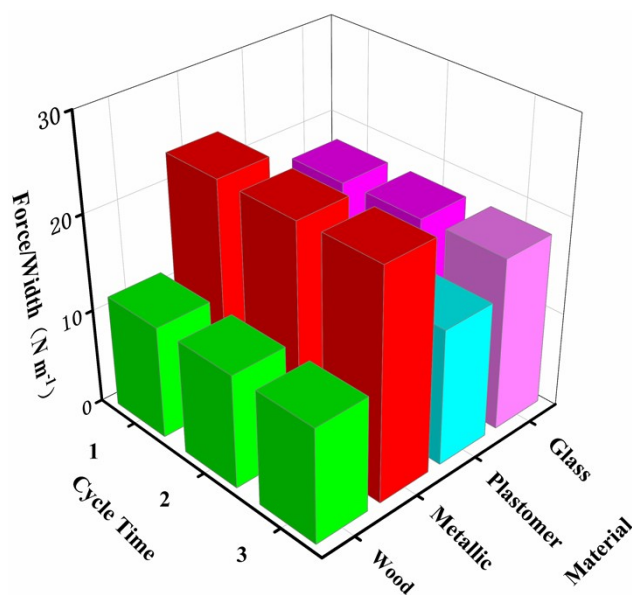

Fig. S8. Adhesion performance of DF-hydrogel to different material substrates

Fig. S8 illustrates that the DF-hydrogel has good adhesion properties to different materials, in which the strongest adhesion is to metal substrates (23.8 N m<sup>-1</sup>), and the difference in the adhesion properties to other substrates is not significant (mainly maintained between 14 and 18 N m<sup>-1</sup>). This is because the -OH on the substrate surface can form hydrogen bonds with DF-hydrogel to impart adhesion properties.

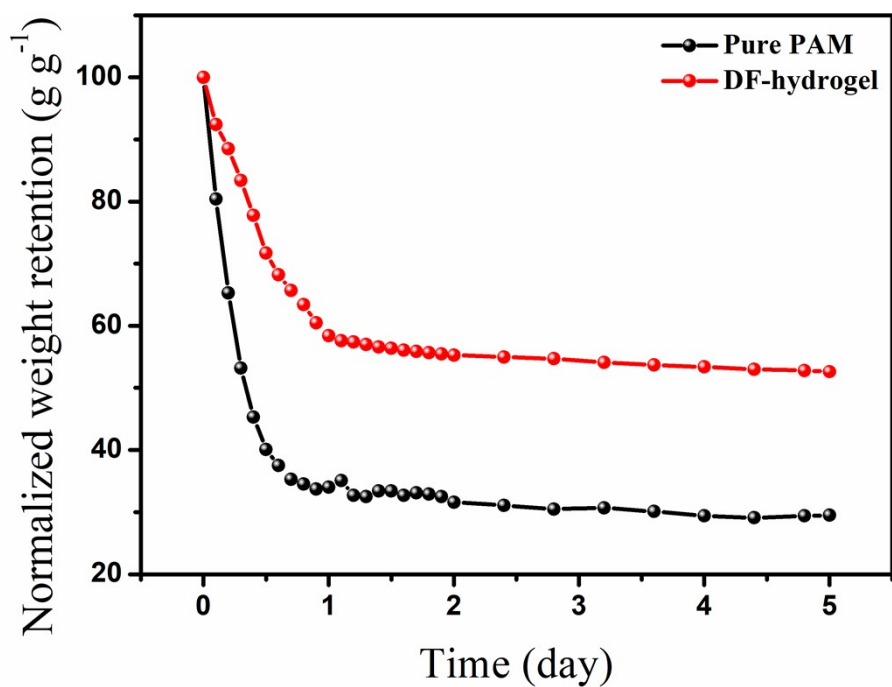

Fig. S9. Water retention of DF-hydrogel and pure PAM hydrogel

Water retention is an important indicator of the durability of hydrogels, as the performance of hydrogels always requires activation in an aqueous environment. Fig. S6 shows that the rate of water evaporation in DF-hydrogel is significantly less than in pure PAM hydrogel, and their water retention rates after 5 days are 56.2% and 26.9% respectively.

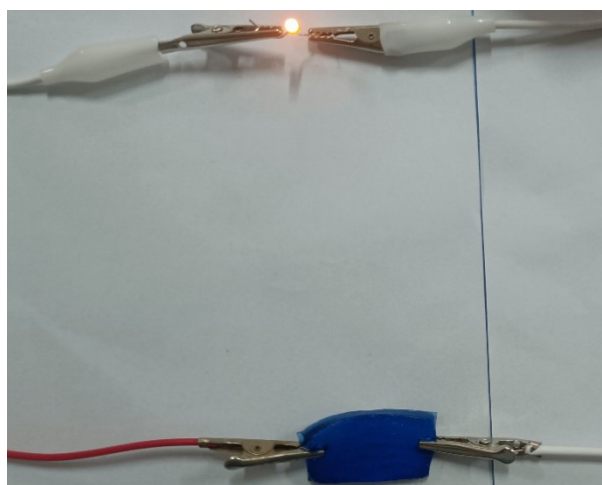

Fig. S10. Photo of DF-hydrogel as wire for lighting the LED

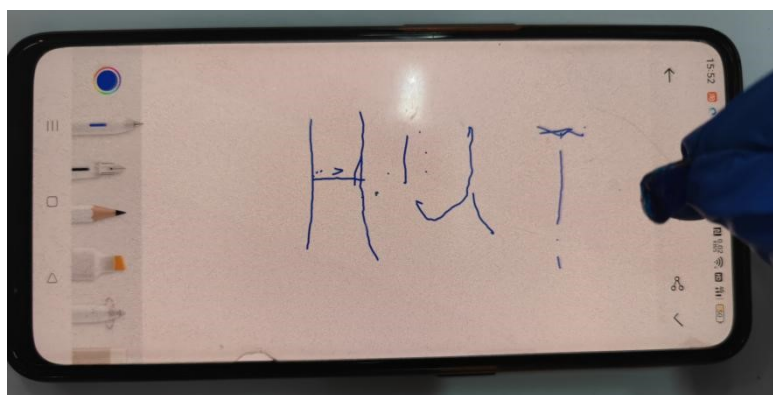

Fig S11. Photo of DF-hydrogel ionic skin acted as stylus to write text on the screen of  
smartphone

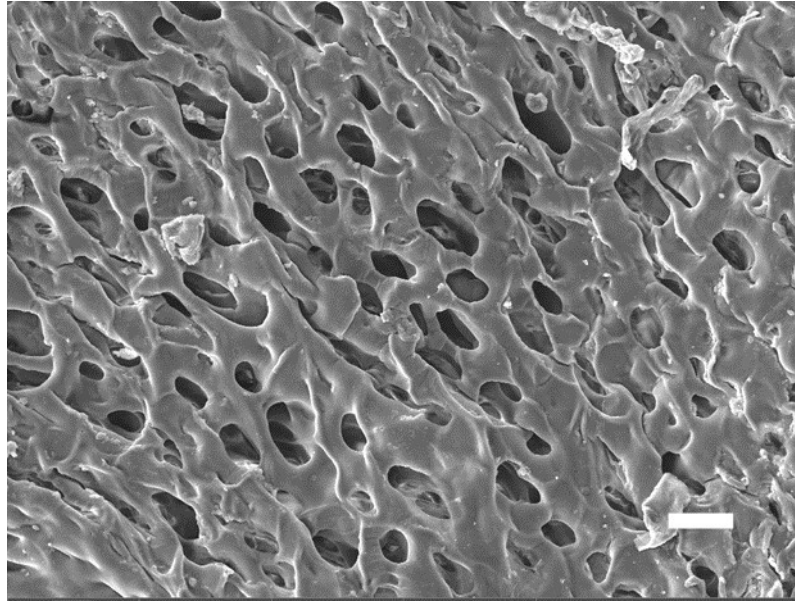

Fig. S12. SEM image of the freeze-dried DF-Hydrogel, scale bar: 20  $\mu\text{m}$ .

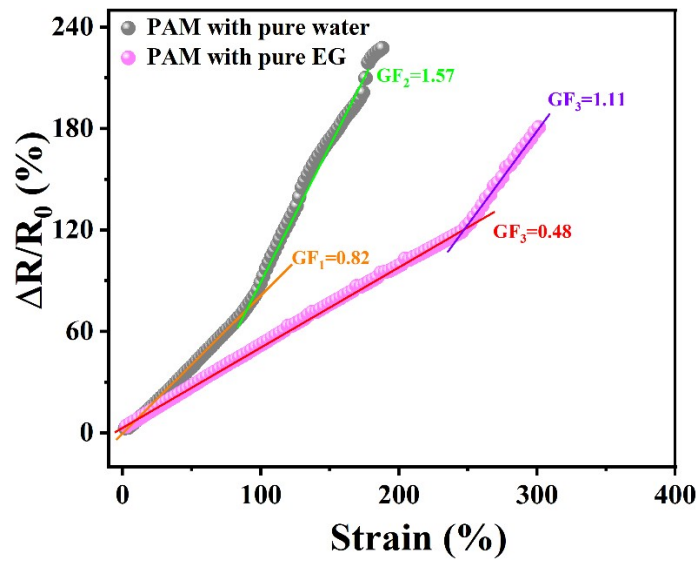

Fig. S13. Relative resistance changes of PAM hydrogel and PAM organogel as a function of strain.



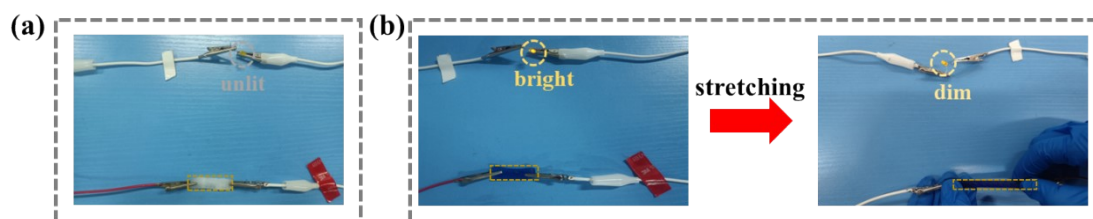

Fig. S14. Photos of the conductivity of hydrogels at low temperature: (a) pure PAM and (b) DF-hydrogel

Table S1. Comparison of comprehensive performances of the hydrogel-based sensors

| Ionic skin                                  | Self-healing capability | Freeze-resistant capability | Gauge factor | Sensitive strain | Ref.      |
|---------------------------------------------|-------------------------|-----------------------------|--------------|------------------|-----------|
| DF-Hydrogel                                 | YES                     | YES                         | 1.99         | 0-300%           | This work |
| PVA/TA@talc/AlCl <sub>3</sub> /EG           | NA                      | YES                         | 1.3          | 0-100%           | Ref. S1   |
| PAAM/SA/NaCl                                | YES                     | NA                          | 2.66         | 0.3-1800%        | Ref. S2   |
| PAM/NaCl                                    | NA                      | NA                          | NA           | 0-500%           | Ref. S3   |
| PAM/LiCl/PDMS                               | NA                      | NA                          | 0.84         | 0-50%            | Ref. S4   |
| PDA-PPy/PAAM                                | NA                      | NA                          | NA           | NA               | Ref. S5   |
| PVA/Gly/CB/CNT                              | NA                      | YES                         | 2.01         | 0-700%           | Ref. S6   |
| PAAM/SA/CNT/CaCl <sub>2</sub>               | NA                      | YES                         | 3.125        | 0-400%           | Ref. S7   |
| PVA/PAA/CNT/FeCl <sub>3</sub> /PEDOT-PSS/EG | YES                     | YES                         | 1.6          | 0-100%           | Ref. S8   |
| PVA/SWCNT                                   | YES                     | NA                          | 1.51         | 0-1000%          | Ref. S9   |
| PANI/PSS-UPy                                | YES                     | NA                          | 3.4          | 0-300%           | Ref. S10  |
| PANI/P(AAm-co-HEMA)                         | YES                     | NA                          | 1.48         | 0-300%           | Ref. S11  |

## References

- S1 X. Pan, Q. Wang, R. Guo, Y. Ni, K. Liu, X. Ouyang, L. Chen, L. Huang, S. Cao, M. Xie. *J. Mater. Chem. A*, 2019, 7, 4525-4535.
- S2 X. Zhang, N. Sheng, L. Wang, Y. Tan, C. Liu, Y. Xia, Z. Nie, K. Sui. *Mater. Horiz.*,

2019, 6, 326-333.

S3 J. Y. Sun, C. Keplinger, G. M. Whitesides, Z. Suo. *Adv. Mater.*, 2014, 26, 7608-7614.

S4 K. Tian, J. Bae, S. E. Bakarich, C. Yang, R. D. Gately, G. M. Spinks, M. I. H. Panhuis, Z. Suo, J. J. Vlassak, *Adv. Mater.*, 2017, 29, 1604827.

S5 L. Han, L. Yan, M. Wang, K. Wang, L. Fang, J. Zhou, J. Fang, F. Ren, X. Lu. *Chem. Mater.*, 2018, 30, 5561-5572.

S6 J. Gu, J. Huang, G. Chen, L. Hou, J. Zhang, X. Zhang, X. Yang, L. Guan, X. Jiang, H. Liu, *ACS Appl. Mater. Interfaces*, 2020, 12, 40815-40827.

S7 J. Zhang, L. Zeng, Z. Qiao, J. Wang, X. Jiang, Y. S. Zhang, H. Yang, *ACS Appl. Mater. Interfaces*, 2020, 12, 30247-30258.

S8 G. Ge, W. Yuan, W. Zhao, Y. Lu, Y. Zhang, W. Wang, P. Chen, W. Huang, W. Si, X. Dong, *J. Mater. Chem. A*, 2019, 7, 5949-5956.

S9 G. Cai, J. Wang, K. Qian, J. Chen, S. Li, P. S. Lee, *Adv. Sci.*, 2017, 4, 1600190.

S10 J. Chen, Q. Peng, T. Thundat, H. Zeng, *Chem. Mater.*, 2019, 31, 4553-4563.

S11 Z. Wang, J. Chen, Y. Cong, H. Zhang, T. Xu, L. Nie, J. Fu, *Chem. Mater.*, 2018, 30, 8062-8069.
